# Supplementary material
Source: Springer Nature journal article supplement (https://www.springermedizin.de/resource/supplementary/12893_2013_444_MOESM5_ESM.pdf/9512154)

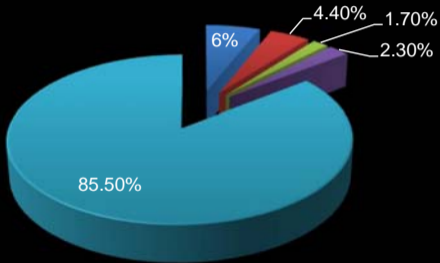

- Seroma
- Wound infection
- Flap necrosis
- Others
- No complication

Supplement: MOESM5 [file 9512154]
